# Supplementary material for: Aqueous Bark Extract ofCeiba speciosa(A. St.-Hill) Ravenna Protects against Glucose Toxicity inCaenorhabditis elegans
Source: Hindawi journal article supplement (doi:10.1155/2020/1321354), 2020-10-08

## Graphical abstract

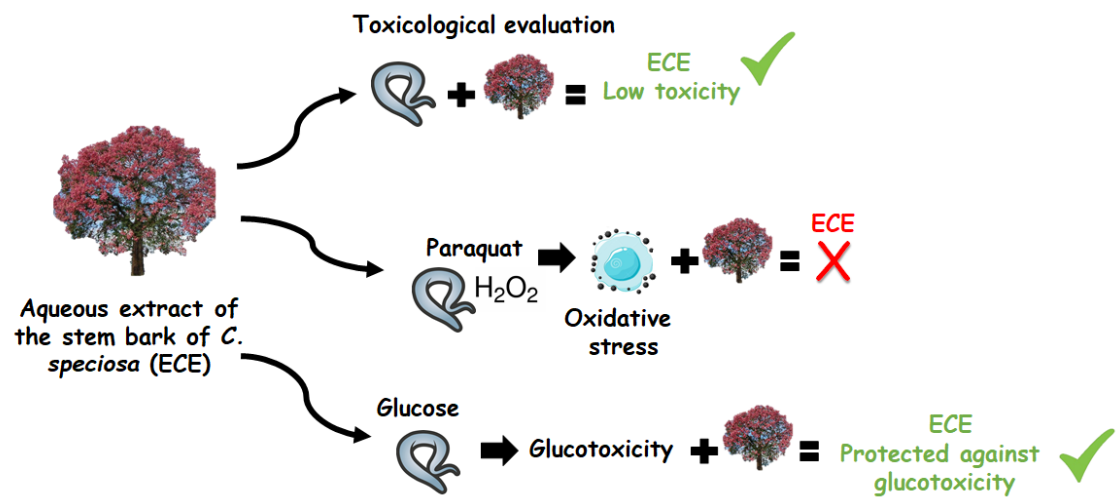

Supplement: f1 [file 1321354.f1.pdf]
